# Supplementary material for: Only a Burden for Females in Math? Gender and Domain Differences in the Relation Between Adolescents’ Fixed Mindsets and Motivation
Source: Springer Nature journal article supplement (doi:10.1007/s10964-020-01345-4), 2020-11-10
Supplement: MOESM1 [file 18574864]

## Supplementary Material

Heyder, A., Weidinger, A.F., & Steinmayr, R. (in press). Only a burden for females in math? Gender and domain differences in the relation between adolescents' fixed mindsets and motivation. *Journal of Youth and Adolescence*.

Table S1

### *Comparison of FA(IR)BULOUS Sample and Population Characteristics*

| Student variables                   | Analytical Sample | Population |
|-------------------------------------|-------------------|------------|
| Female students                     | 48.2%             | 47.3%      |
| Comprehensive school (Gesamtschule) | 30.1%             | 32.2%      |
| Intermediate track (Realschule)     | 53.0%             | 46.9%      |
| Lowest track (Hauptschule)          | 16.9%             | 20.9%      |
| German spoken at home               | 82.0%             | 73.4%      |

*Note.* The student population data was provided by the Ministry for School and Further Education North Rhine-Westphalia (MSW, 2017).

Table S2

*Measurement Invariance Tests for Female vs. Male Adolescents' Ability Self-Concept, Intrinsic Motivation and Mindset in Math*

|                            |                | Model fit |      |       |      |                   |      | Model comparison |              |             |      |              |
|----------------------------|----------------|-----------|------|-------|------|-------------------|------|------------------|--------------|-------------|------|--------------|
|                            |                | $X^2$     | $df$ | $p$   | CFI  | RMSEA [90% CI]    | SRMR | CM               | $\Delta X^2$ | $\Delta df$ | $p$  | $\Delta CFI$ |
| ASC and fixed mindset math | (1) Configural | 38.57     | 18   | .003  | .991 | .051 [.029; .074] | .072 |                  |              |             |      |              |
|                            | (2) Metric     | 45.16     | 23   | .004  | .990 | .047 [.026; .068] | .073 | (1)              | 1.36         | 5           | .929 | -.001        |
|                            | (3) Scalar     | 49.56     | 27   | .005  | .990 | .044 [.024; .063] | .074 | (2)              | 4.74         | 4           | .315 | 0            |
| IM and fixed mindset math  | (1) Configural | 62.47     | 18   | <.001 | .979 | .076 [.056; .097] | .060 |                  |              |             |      |              |
|                            | (2) Metric     | 71.76     | 23   | <.001 | .976 | .070 [.052; .089] | .060 | (1)              | 0.54         | 5           | .994 | -.003        |
|                            | (3) Scalar     | 78.92     | 27   | <.001 | .975 | .067 [.050; .084] | .061 | (2)              | 7.10         | 4           | .131 | -.001        |

*Note.* ASC = ability self-concept. IM = intrinsic motivation. Because student's mindset had only two indicators, it was tested for measurement invariance simultaneously with IM and ASC. The covariance between the constructs was fixed to zero. CM = comparison model.

Table S3

*Measurement Invariance Tests for Female vs. Male Adolescents' Ability Self-Concept, Intrinsic Motivation and Mindset in Language Arts*

|                          |                                 | Model fit      |    |      |      |                   |      | Model comparison |                  |      |      |       |
|--------------------------|---------------------------------|----------------|----|------|------|-------------------|------|------------------|------------------|------|------|-------|
|                          |                                 | X <sup>2</sup> | df | p    | CFI  | RMSEA [90% CI]    | SRMR | CM               | Δ X <sup>2</sup> | Δ df | p    | Δ CFI |
| ASC and fixed mindset LA | (1) Configural                  | 24.26          | 18 | .149 | .996 | .028 [.000; .055] | .027 |                  |                  |      |      |       |
|                          | (2) Metric                      | 27.70          | 23 | .228 | .997 | .022 [.022; .047] | .030 | (1)              | 1.11             | 5    | .953 | .001  |
|                          | (3) Scalar                      | 31.60          | 27 | .247 | .997 | .020 [.000; .044] | .034 | (2)              | 3.89             | 4    | .422 | 0     |
| IM and fixed mindset LA  | (1) Configural                  | 24.23          | 16 | .085 | .996 | .035 [.000; .061] | .025 |                  |                  |      |      |       |
|                          | (2) Metric                      | 29.83          | 21 | .095 | .996 | .031 [.000; .055] | .030 | (1)              | 4.26             | 5    | .513 | 0     |
|                          | (3) Scalar                      | 47.63          | 25 | .004 | .989 | .046 [.025; .065] | .038 | (2)              | 16.68            | 4    | .002 | -.007 |
|                          | (4) Partial scalar <sup>a</sup> | 29.25          | 24 | .211 | .997 | .023 [.000; .047] | .030 | (2)              | 0.58             | 3    | .996 | .001  |

*Note.* ASC = ability self-concept. IM = intrinsic motivation. LA = German language arts. The first and fourth IM items were allowed to correlate. Because student's mindset had only two indicators, it was tested for measurement invariance simultaneously with IM and ASC. The covariance between the constructs was fixed to zero. CM = comparison model.

<sup>a</sup>The intercept of the fourth IM item was freed.
